# Supplementary material for: Can a repository site be safer than safe? – Criteria and methods for a safety-oriented comparison of repository sites
Source: Copernicus journal article supplement (doi:10.5194/sand-1-41-2021), 2021-11-10
Supplement: Supplementary file 1 [file sand-1-41-2021-supplement.pdf]

Supplement of Saf. Nucl. Waste Disposal, 1, 41–42, 2021  
<https://doi.org/10.5194/sand-1-41-2021-supplement>  
© Author(s) 2021. CC BY 4.0 License.

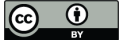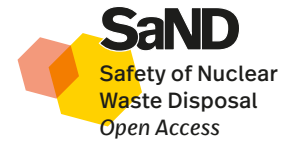

*Supplement of*

## **Can a repository site be safer than safe? – Criteria and methods for a safety-oriented comparison of repository sites**

**Martin Navarro et al.**

*Correspondence to:* Martin Navarro ([martin.navarro@bfe.bund.de](mailto:martin.navarro@bfe.bund.de))

The copyright of individual parts of the supplement might differ from the article licence.

# Can a repository site be safer than safe?

## Criteria and methods for a safety-oriented comparison of repository sites

Martin Navarro\*, Ingo Kock\*, Gerd Frieling\*, Thomas Beuth\*

*\* formerly at GRS gGmbH*

SafeND 2021, session "Site selection – methods and overviews"

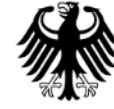

Federal Office  
for the Safety of  
Nuclear Waste Management

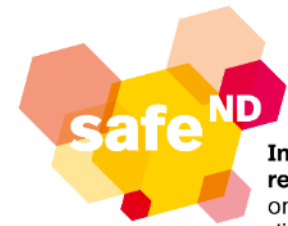

Interdisciplinary  
research symposium  
on the safety of nuclear  
disposal practices

# Selection steps

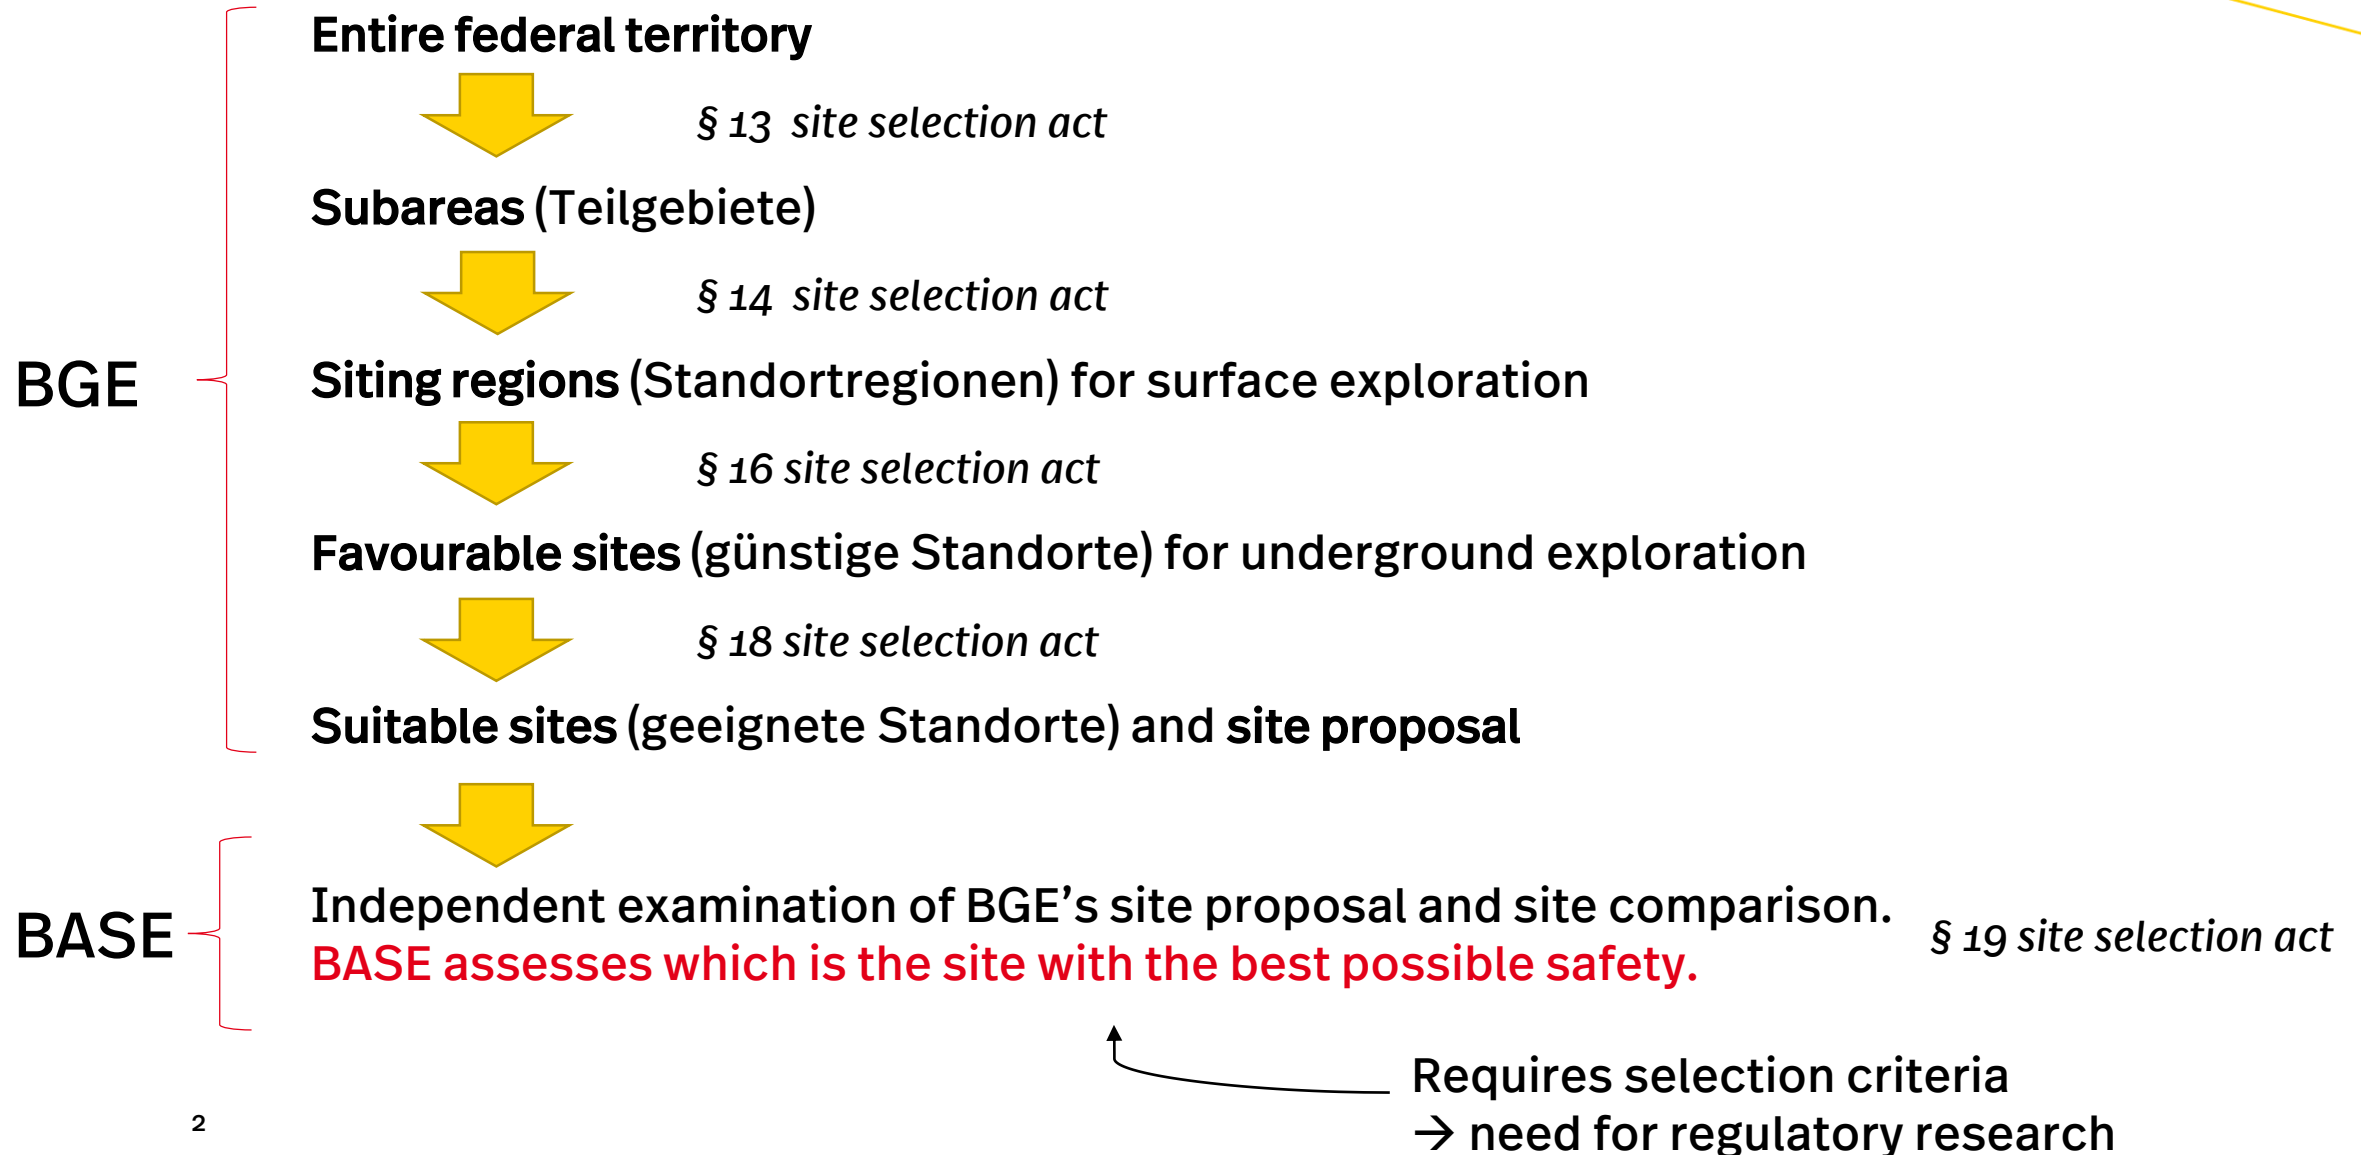

# Safety-oriented regulatory criteria for site selection

- **Exclusion criteria (Ausschlusskriterien)** – § 22 *StandAG*
- **Minimum requirements (Mindestanforderungen)** – § 23 *StandAG*
- **Geoscientific weighing criteria (geowissenschaftliche Abwägungskriterien)** – § 24 *StandAG*  
& **(unspecified) safety-oriented weighing of criteria (sicherheitsgerichtete Abwägung)**

Can the **geoscientific weighing criteria** narrow options down to **one single** site?

- Focus on geological setting (not on entire system)

→ Not all aspects of safety covered

→ Additional criteria needed to find system with best possible safety

## Conditions of the final selection step

The site with best possible safety might have to be selected from „high-quality“ sites that meet the regulatory requirements (EndlSichAnfV) thus being “safe” in this sense

**Our task in this case:**

Select the safest site from a set of “safe” sites!

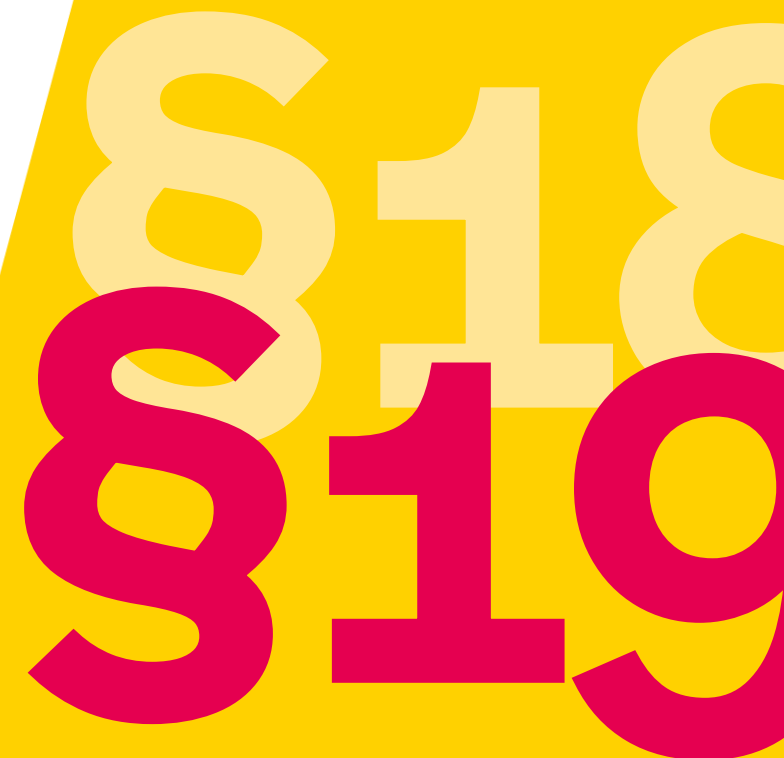

# Identifying the safest site among “safe” sites

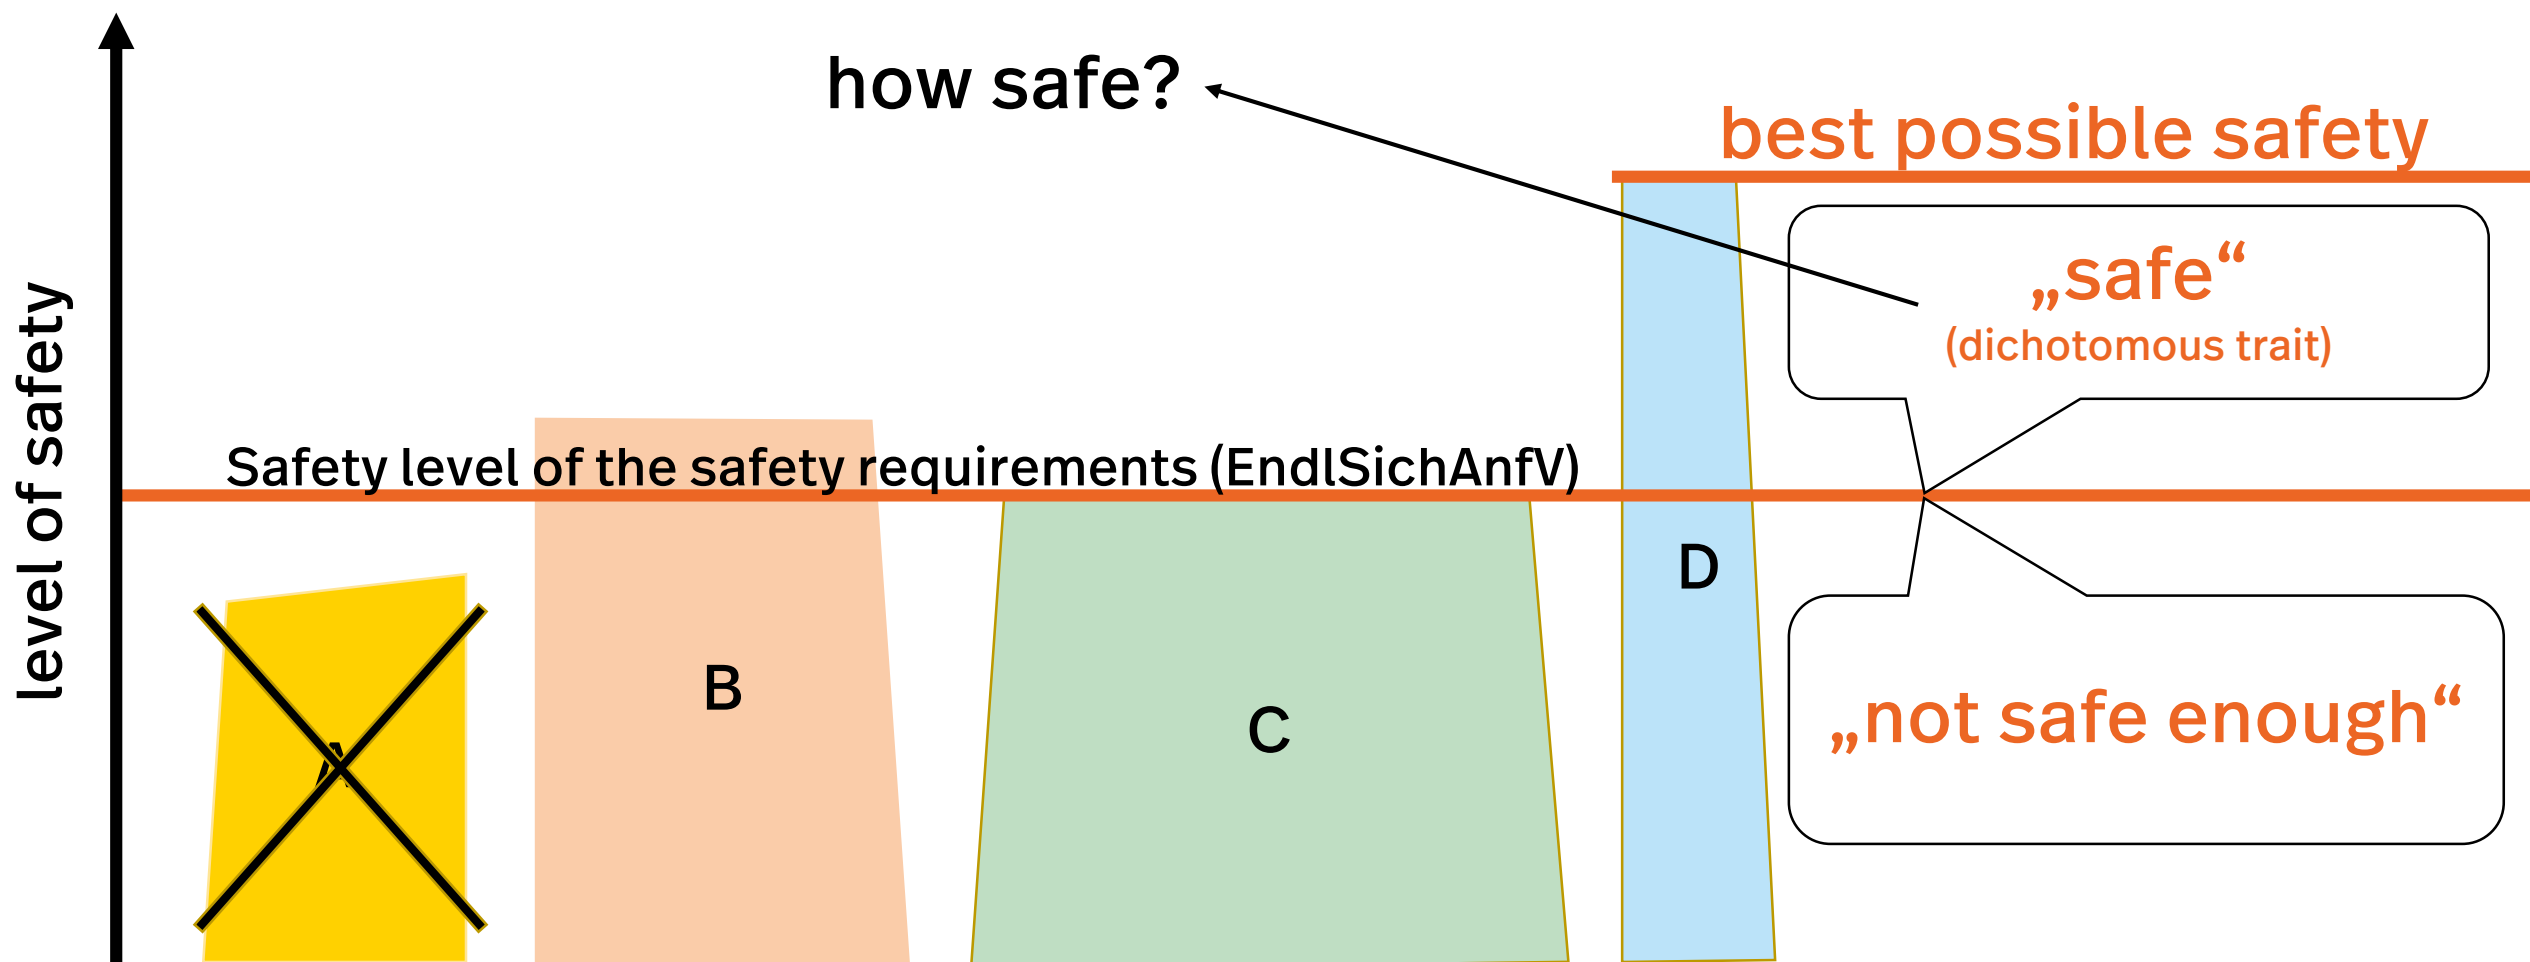

# Use dose or containment indicators as safety measures?

- Calculated by models
- Models are always conservative (pessimistic) and we don't know how conservative

→ We only see a minimum safety

→ A system that appears to be less safe in the calculations could be the safest!

No suitable measures of safety!

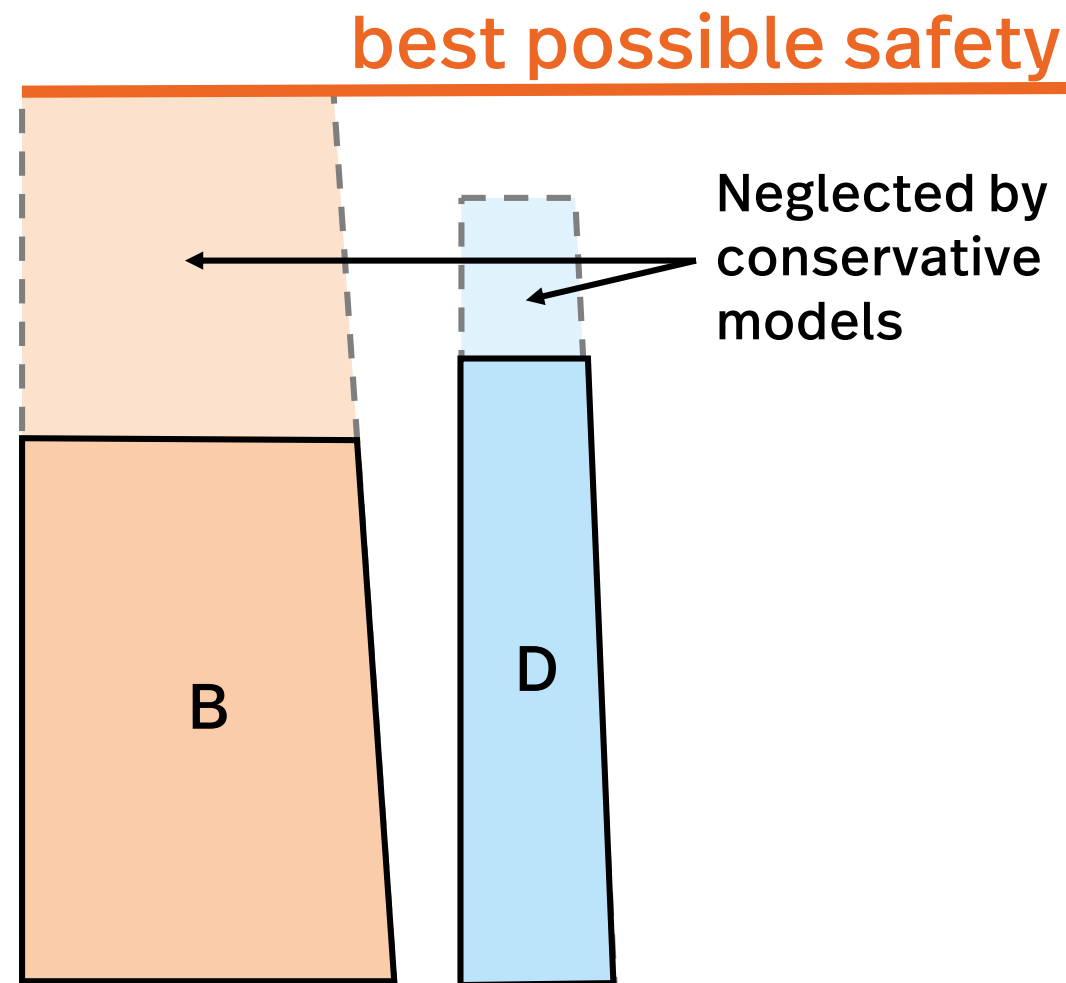

# Criteria needed to compare the safety of sites!

They should be ...

- able to compare systems that may differ fundamentally with regard to host rock, geosystem, safety and repository concept
- safety-related
- related to the real system – e. g. independent from definitions
- operational (verifiable) – evaluation must be possible
- differentiating – should not yield same results for all sites
- acceptable – many should be able to agree
- intelligible – many should be able to understand
- scientifically justified

A demanding task!



# BMU project 3607R02589 in joint project VerSi (2007 – 2010)

Carried out by GRS  
Report: GRS-A-3536

## Goals

- Criteria and evaluation methods for the final selection step
- Evaluation test for generic salt and claystone sites

## Main ideas

- The **robustness of the system** provides a suitable measure of safety for “safe” sites
- The robustness of the system can be derived from the **robustness of safety functions**

# Analysing the system's safety related structure

The VerSi approach does not calculate numbers for safety which is not very transparent.

It analyses the **system's safety related structure** (it looks at safety functions of components)

- Shows **why** the system is robust (and thus safe)
- Allows to include **additional arguments** e. g. to draw a comprehensive picture of a system's **safety reserves**



safety:  
2.11

safety:  
1.73

# Follow-up BMU projects VerSi II and III (carried out by GRS)

**Versi II (05504/2)**, 2014 – 2017, report: GRS-478

- Impact of retrievability
- Few methodical amendments
- Applicability to phase 1 of the site selection process

**VerSi III (4719E03250)**, 2019 – 2021

- Data compilation for crystalline rock (updated for salt & claystone)
- **Comprehensive description of criteria and the complex evaluation method**

revealed gaps in the argumentation  
and a need for further R&D

## Problem #1: Equal strictness of design requirements

**Two systems with perfectly robust safety functions should be equally safe  
(implicit assumption of VerSi)**

**But ...**

- Is this true if host rocks or concepts differ? Couldn't a robust clay concept be safer or less safe than a robust crystalline concept?
- Wouldn't an unambitious system design with slack criteria for safety function robustness appear to be more robust and thus safer?

VerSi tried to tackle this problem by demanding „equal strictness of design requirements“

# Problem #1: Equal strictness of design requirements

However, VerSi did not explain ...

- what „equal strictness of design requirements” exactly means
- how it is achieved or checked

→ Difficult to establish a clear link between robustness and safety

→ We can't simply translate differences in robustness into differences in safety

We are at least lacking a safety-related benchmark that makes sites comparable

## Problem #2: No final aggregation

The VerSi method determines the robustness and relevance of safety functions as a basis for decision-making

It provides no guidance to the decision-makers on what to do with the individual robustness criteria in order to reach a decision

Can a justifiable procedure be found?

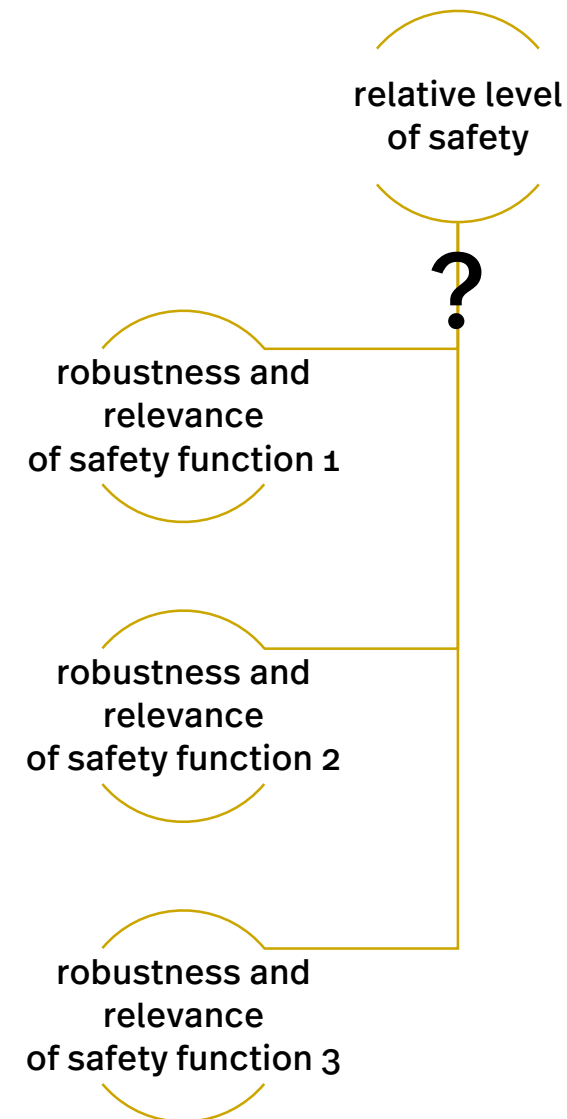

# BASE project METIENS (2022 – 2024)

These problems will be addressed in BASE project METIENS.

Continues research of VerSi I, II, and III.

## Goals

- Find criteria to find the site with best possible safety
- Refine and test evaluation method
- Develop aggregation procedure  
(probably using a verbal decision analysis)

## METIENS

*Methods, evaluation criteria and transparent decision processes for identifying a repository site with the best possible safety when data from underground exploration are available*

*Methoden, Bewertungskriterien und transparente Entscheidungsprozesse zur Identifikation eines Endlagerstandortes mit bestmöglicher Sicherheit nach Vorliegen untertägiger Standortdaten*

# Why „METIENS“ and not „VerSi IV“?

VerSi = Vergleichende Sicherheitsanalysen  
= comparative safety analyses

But this approach has moved away from the initial idea of comparing safety analyses.

**metiens** (lat.) = measuring, estimating

Finding a measure for relative safety is what we need to do!

## **METIENS**

*Methods, evaluation criteria and transparent decision processes for identifying a repository site with the best possible safety when data from underground exploration are available*

*Methoden, Bewertungskriterien und transparente Entscheidungsprozesse zur Identifikation eines Endlagerstandortes mit bestmöglicher Sicherheit nach Vorliegen untertägiger Standortdaten*
